# Supplementary material for: Morphology and selectivity of hydrated alkali metal ions as depth of discharge in the 1T-MoS2 electrode with aqueous electrolytes
Source: Royal Society of Chemistry journal article supplement (doi:10.1039/d3cp06031d), 2024-01-01
Supplement: d3cp06031d1.pdf [file d3cp06031d1.pdf]

**Supporting information**

**Morphology and selectivity of hydrated  
alkali metal ions as depth of discharge in  
1T-MoS<sub>2</sub> electrode with aqueous  
electrolytes**

Shenrui Liao, Wenhui Zhao\*, and Xiao Gu\*

School of Physical Science and Technology, Ningbo University, Ningbo 315211, China

Email: guxiao@nbu.edu.cn, zhaowenhui@nbu.edu.cn

|                | coordination<br>number<br>(chemistry) | ionic bond type | symbolic                                                                            |
|----------------|---------------------------------------|-----------------|-------------------------------------------------------------------------------------|
| Y-O ionic bond | $\leq 2$                              | Li-O            |  |
|                |                                       | Na-O            |  |
|                |                                       | K-O             |  |
|                | $\geq 3$                              | Li-O            |  |
|                |                                       | Na-O            |  |
|                |                                       | K-O             |  |

1

2 Table S1. The characteristics of Y-O ionic bonding in the morphology diagrams are  
3 listed. For oxygen coordination number  $\leq 2$ , and the ionic bonding types are indicated  
4 by different colored lines. For oxygen coordination number  $\geq 3$ , different ionic bonding  
5 situations and ionic bonding types are more clearly indicated by different colored facets.

6

|                                |                                           | spacing                     | symbolic                                                                              |
|--------------------------------|-------------------------------------------|-----------------------------|---------------------------------------------------------------------------------------|
| Water molecule<br>interactions | oxygen-oxygen<br>interaction ( $d_{OO}$ ) | $d_{OO} > 3.5\text{\AA}$    |  |
|                                |                                           | $d_{OO} \leq 3.5\text{\AA}$ |  |
|                                | hydrogen bond<br>( $d_{OH}$ )             | $d_{OH} > 2.5\text{\AA}$    | unmarked                                                                              |
|                                |                                           | $d_{OH} \leq 2.5\text{\AA}$ |  |

7

8 Table S2. The characteristics between water molecules in the morphology diagram  
9 are listed; oxygen-oxygen spacing  $> 3.5\text{\AA}$ , no interaction, indicated by light red dashed  
10 lines; oxygen-oxygen spacing  $\leq 3.5\text{\AA}$ , mutual repulsion exists, indicated by red dashed  
11 lines. Hydrogen bond length  $> 2.5\text{\AA}$ , no hydrogen bonding, not labeled; hydrogen bond  
12 length  $\leq 2.5\text{\AA}$ , hydrogen bonding, indicated by blue dashed line. Water molecules O-H  
13 have interactions with each other to form hydrogen bonding conditions  $d_{OH} \leq 2.5\text{\AA}$  ( $d_{OH}$   
14 denotes the distance between O-H),  $\theta_{OHO} \geq 150^\circ$ ,  $d_{OO} \leq 3.5\text{\AA}$ ,  $\theta_{HOO} \leq 30^\circ$ .

15

16

17

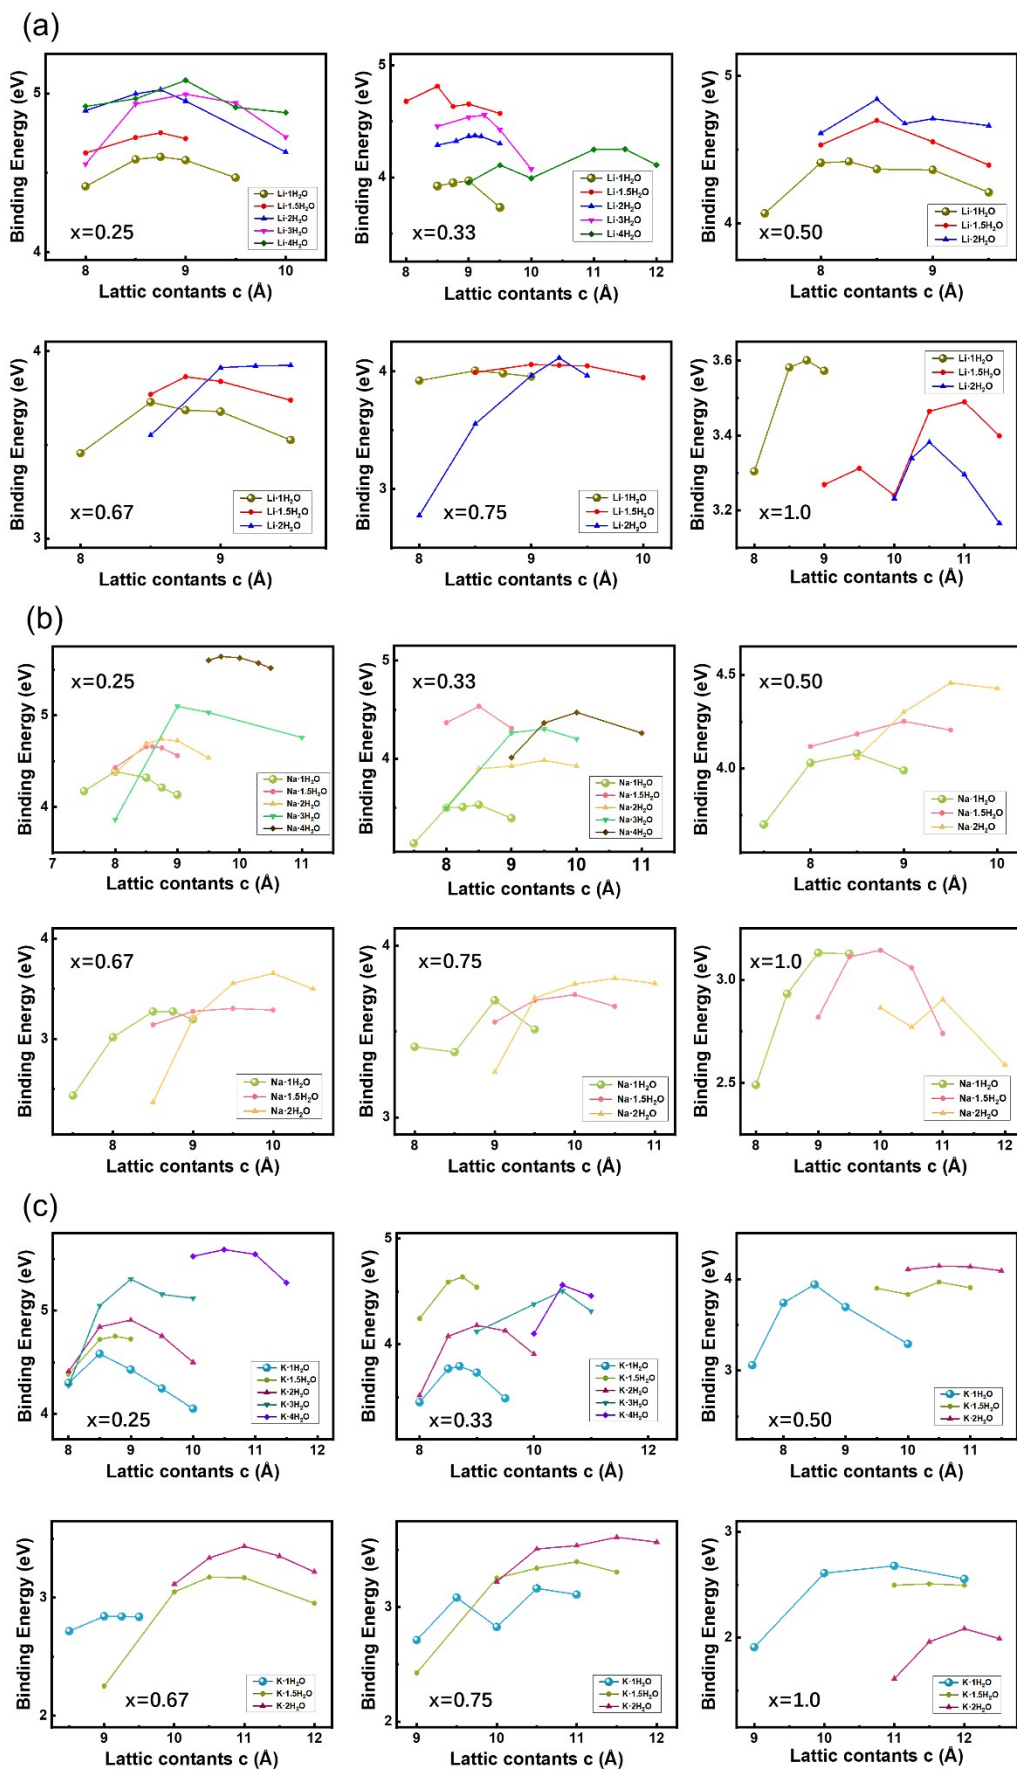

---

1 Figure S1. The binding energies of different systems of  $[Y \cdot mH_2O]_x MoS_2$  (Y=Li, Na,  
2 K;  $x=0.25, 0.33, 0.50, 0.67, 0.75, 1.0$ ;  $m=1, 1.5, 2, 3, 4$ ) were obtained by varying the  
3 strain in the direction of the z-axis. (a) Optimized free energies of  $[Li \cdot mH_2O]_x MoS_2$   
4 system. (b) Optimized free energies of  $[Na \cdot mH_2O]_x MoS_2$  system. (c) Optimized free  
5 energies of  $[K \cdot mH_2O]_x MoS_2$  system.  
6

1

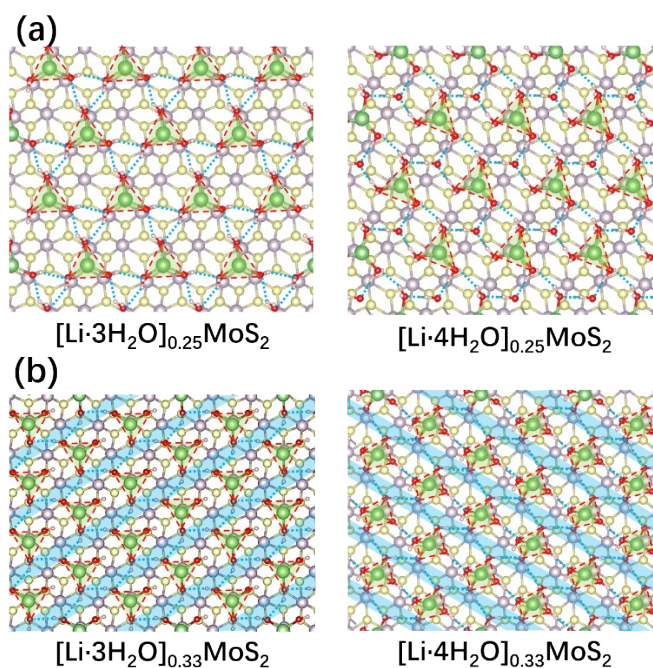

2

3 Figure S2. Hydrated lithium ion morphology of  $[\text{Li} \cdot m\text{H}_2\text{O}]_x\text{MoS}_2$  intra-layer  
4 intercalation at low discharge depths. (a) Top view of 3 and 4 water molecules bound  
5 respectively for a discharge status of  $x=0.25$ . (b) Top view of 3 and 4 water molecules  
6 bound respectively for a discharge status of  $x=0.33$ .

7

8

9

10

11

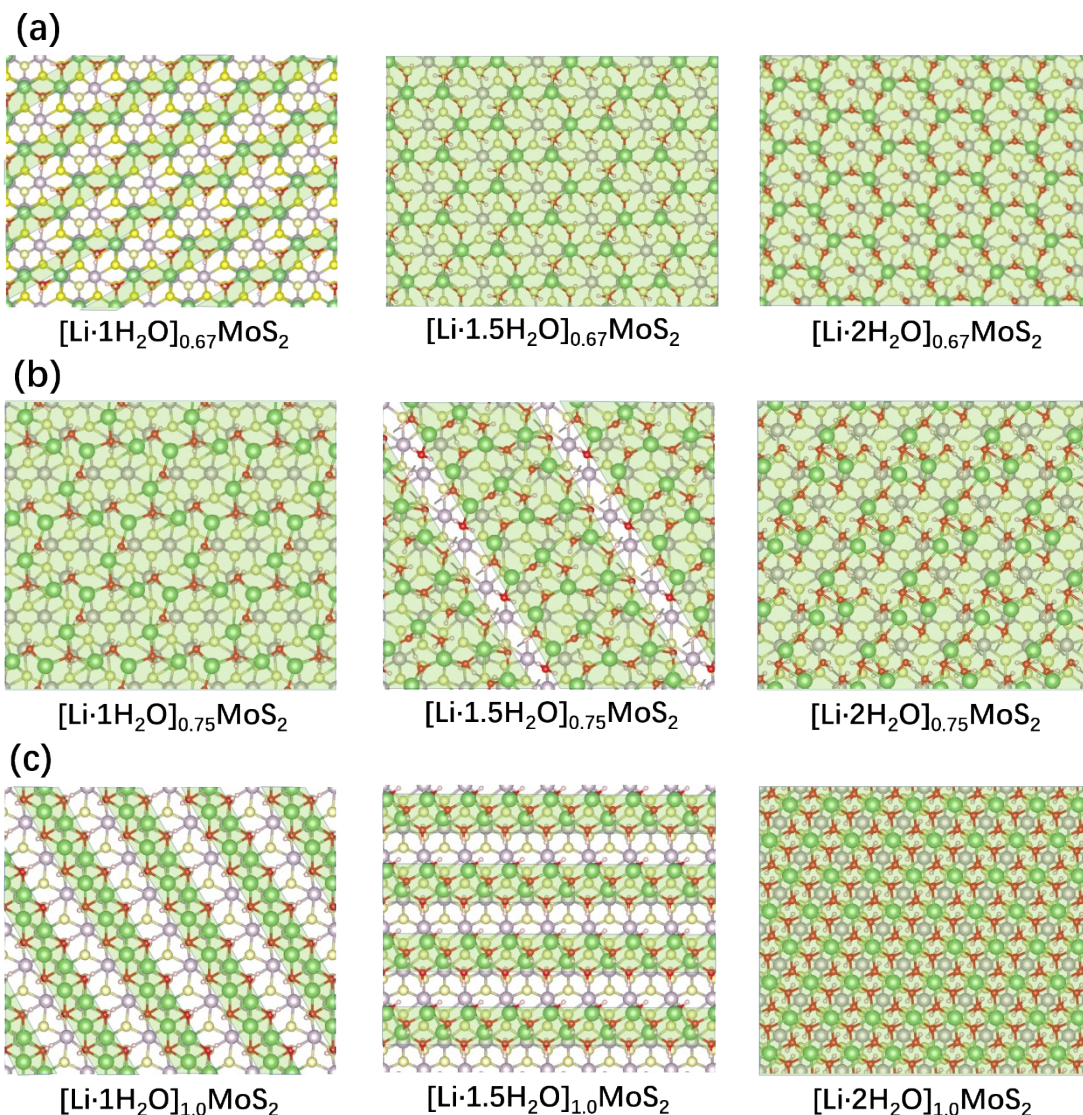

1  
2 Figure S3. Hydrated lithium ion morphology of  $[\text{Li} \cdot m\text{H}_2\text{O}]_x\text{MoS}_2$  intra-layer  
3 intercalation at high discharge depths. (a) Top views of 1, 1.5, and 2 water molecules  
4 bound respectively for a discharge status of  $x=0.67$ . (b) Top views for discharge status  
5 of  $x=0.75$  combining 1, 1.5, and 2 water molecules, respectively. (c) Top views of 1,  
6 1.5, and 2 water molecules combined for a discharge status of  $x=1.0$ , respectively.

7  
8  
9



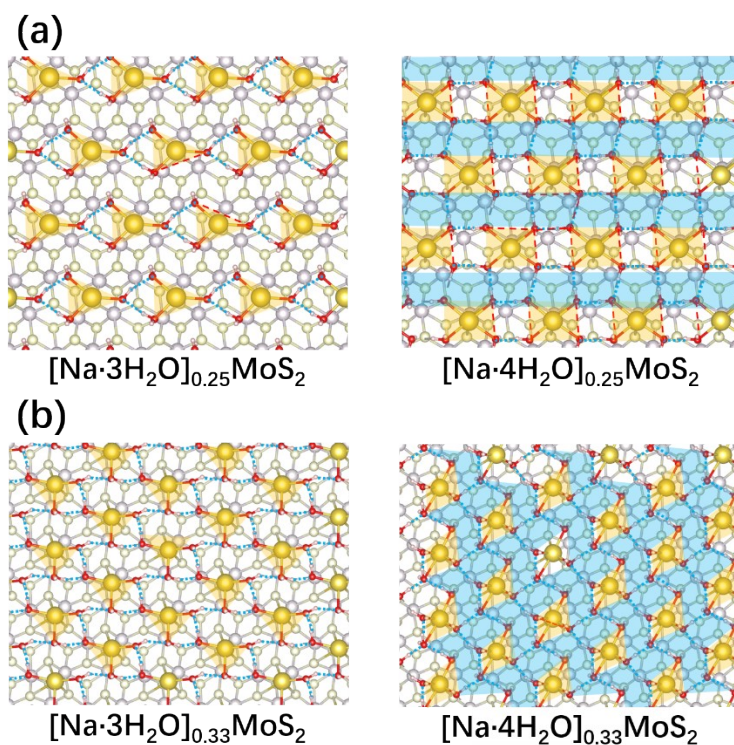

1  
2 Figure S4. Hydrated sodium ion morphology of  $[\text{Na} \cdot m\text{H}_2\text{O}]_x\text{MoS}_2$  intra-layer  
3 intercalation at low discharge depths. (a) Top view of 3 and 4 water molecules bound  
4 respectively for a discharge status of  $x=0.25$ . (b) Top view of 3 and 4 water molecules  
5 bound respectively for a discharge status of  $x=0.33$ .

6  
7

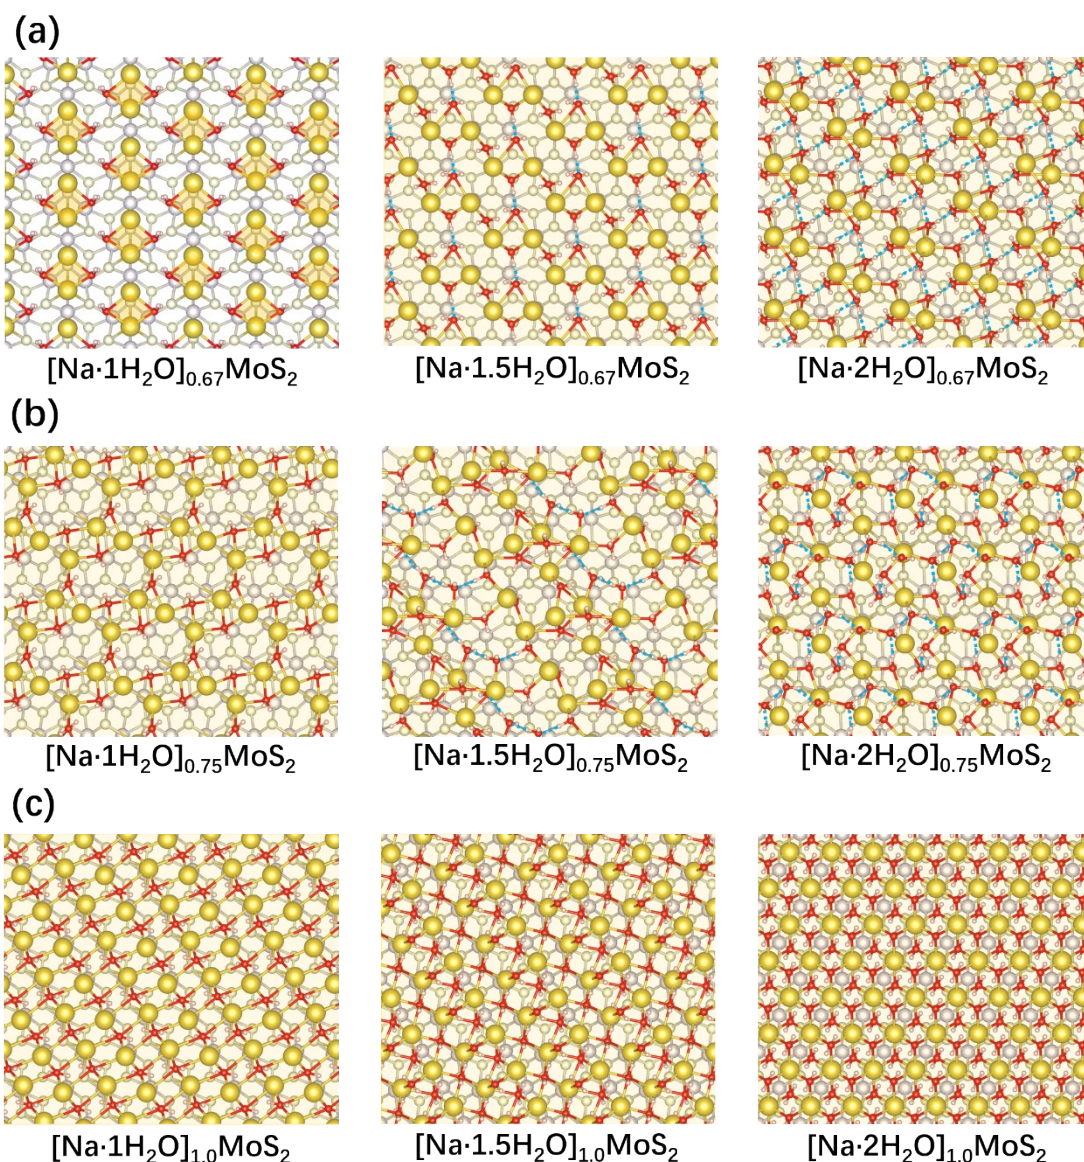

1  
2 Figure S5. Hydrated sodium ion morphology of  $[\text{Na} \cdot m\text{H}_2\text{O}]_x\text{MoS}_2$  intra-layer  
3 intercalation at high discharge depths. (a) Top views of 1, 1.5, and 2 water molecules  
4 bound respectively for a discharge status of  $x=0.67$ . (b) Top views of 1, 1.5, and 2 water  
5 molecules bound for a discharge status of  $x=0.75$ , respectively. (c) Top views of 1, 1.5,  
6 and 2 water molecules bound for a discharge status of  $x=1.0$ , respectively.

7  
8  
9



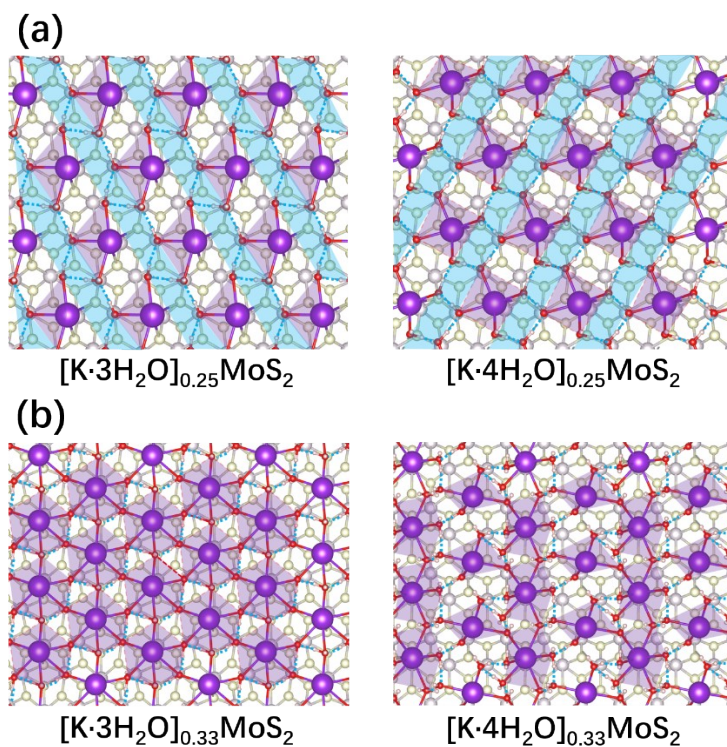

1  
2 Figure S6. Hydrated potassium ion morphology of  $[\text{K} \cdot m\text{H}_2\text{O}]_x\text{MoS}_2$  intra-layer  
3 intercalation at low discharge depths. (a) Top view of 3 and 4 water molecules bound  
4 respectively for a discharge status of  $x=0.25$ . (b) Top view of 3 and 4 water molecules  
5 bound respectively for a discharge status of  $x=0.33$ .

6  
7  
8

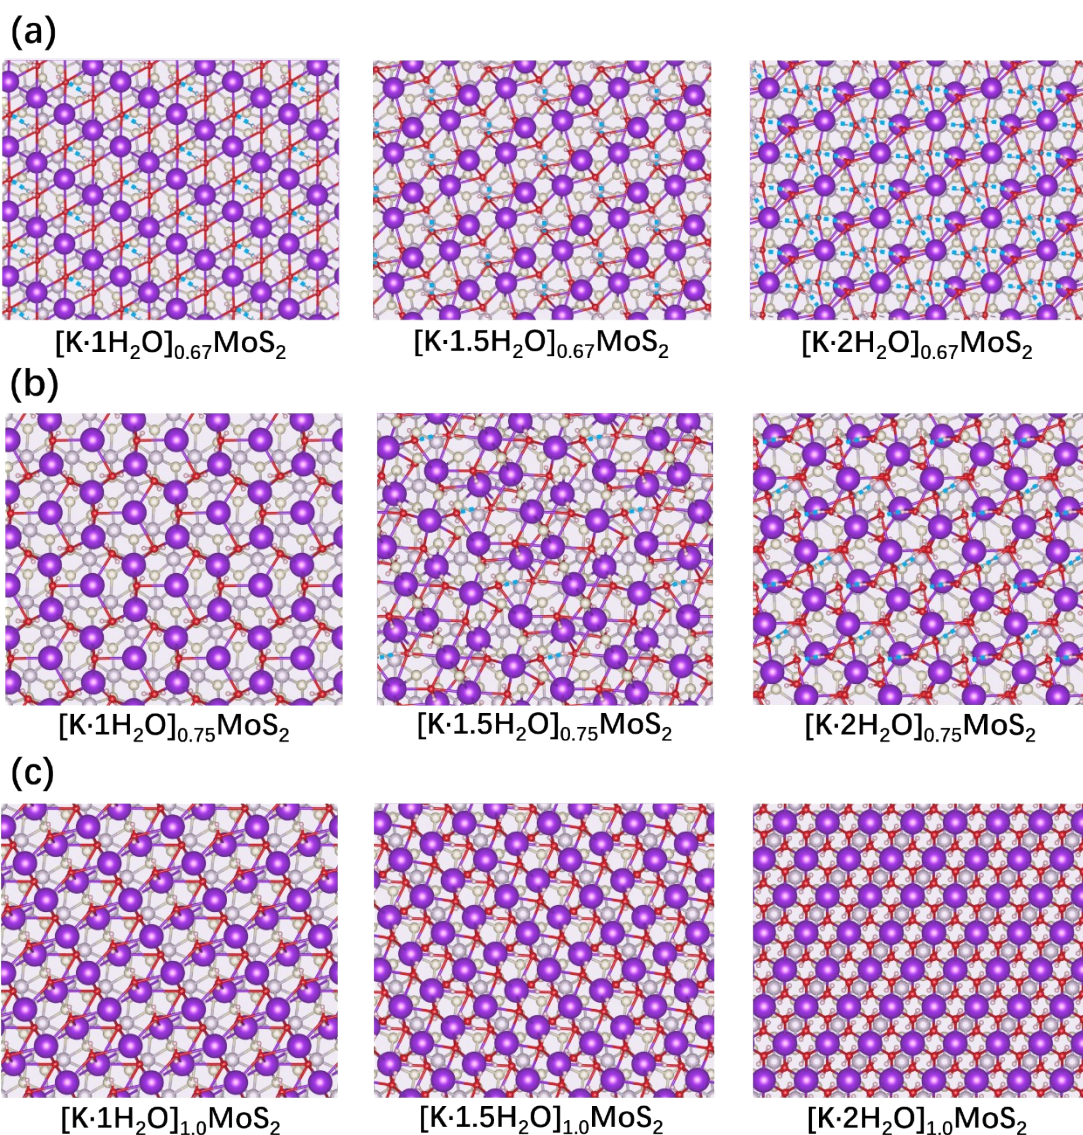

1  
2 Figure S7. Hydrated potassium ion morphology of  $[\text{K} \cdot m\text{H}_2\text{O}]_x\text{MoS}_2$  intra-layer  
3 intercalation at high discharge depths. (a) Top views of 1, 1.5, and 2 water molecules  
4 bound respectively for a discharge status of  $x=0.67$ . (b) Top views for discharge status  
5 of  $x=0.75$  binding 1, 1.5, and 2 water molecules, respectively. (c) Top views of 1, 1.5,  
6 and 2 water molecules bound for a discharge status of  $x=1.0$ , respectively.

7  
8  
9

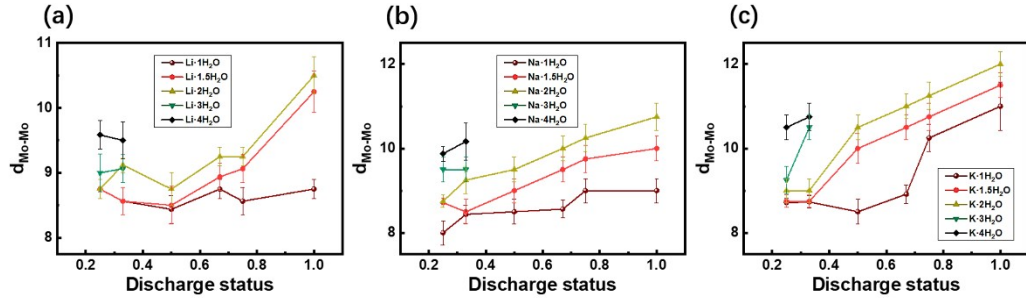

1

2 Figure S8. Effect of the status of discharge in hydrated ions on MoS<sub>2</sub> layer spacing. (a)  
 3 the role of  $[\text{Li} \cdot m\text{H}_2\text{O}]_x\text{MoS}_2$  ( $m=1, 1.5, 2, 3, 4$ ) on layer spacing at different degrees of  
 4 hydration. (b) the role of  $[\text{Na} \cdot m\text{H}_2\text{O}]_x\text{MoS}_2$  ( $m=1, 1.5, 2, 3, 4$ ) on layer spacing at  
 5 different status of hydration. (c) the role of  $[\text{K} \cdot m\text{H}_2\text{O}]_x\text{MoS}_2$  ( $m=1, 1.5, 2, 3, 4$ ) on layer  
 6 spacing at different status of hydration.

7

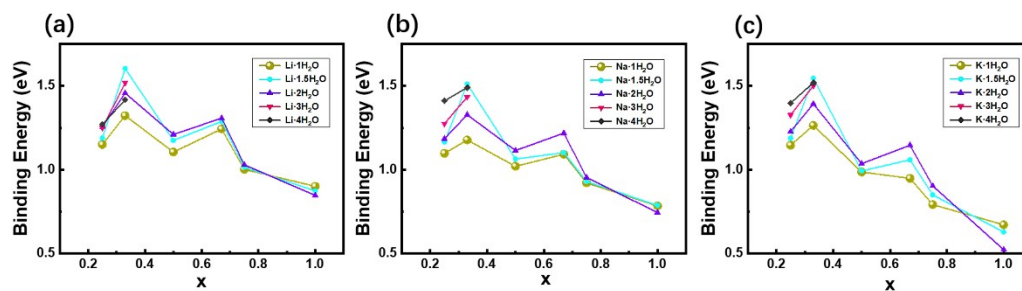

1

2 Figure S9. Effect of discharge status on the binding energy of the system. (a)  
3 [Li· $m$ H<sub>2</sub>O]<sub>x</sub>MoS<sub>2</sub> ( $m=1, 1.5, 2, 3, 4$ ) at different levels of hydration decreases with  
4 increasing discharge status. (b) [Na· $m$ H<sub>2</sub>O]<sub>x</sub>MoS<sub>2</sub> ( $m=1, 1.5, 2, 3, 4$ ) at different levels  
5 of hydration increases the binding energy of the system decreases with increasing  
6 discharge status. (c) [K· $m$ H<sub>2</sub>O]<sub>x</sub>MoS<sub>2</sub> ( $m=1, 1.5, 2, 3, 4$ ) The binding energy of the  
7 system increases linearly with the increase of the discharge status.

8



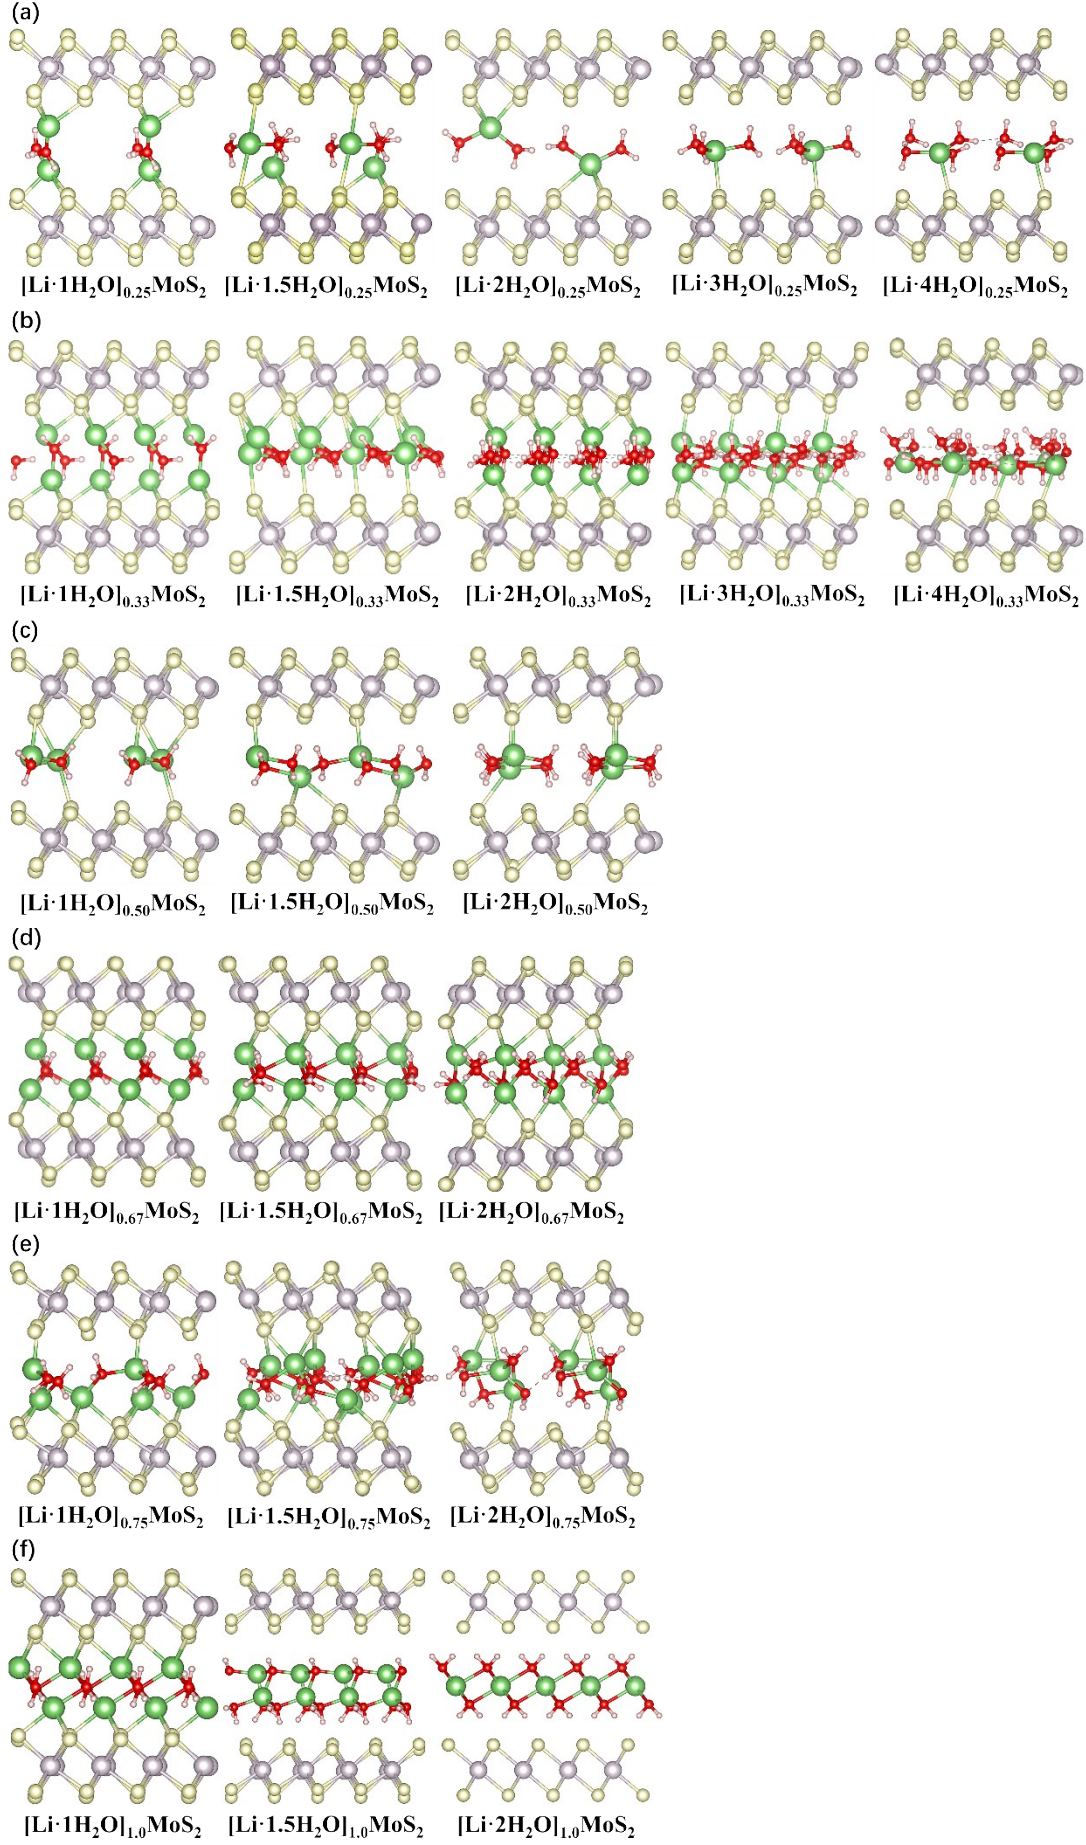

---

1 Figure S10. Side view of  $[\text{Li} \cdot m\text{H}_2\text{O}]_x\text{MoS}_2$  intra-layer intercalation. (a) Side views of  
2 1, 1.5, 2,3 and 4 water molecules bound respectively for a discharge status of  $x=0.25$ .  
3 (b) Side views of 1, 1.5, 2,3 and 4 water molecules bound respectively for a discharge  
4 status of  $x=0.33$ . (c) Side views of 1, 1.5 and 2 water molecules bound respectively for  
5 a discharge status of  $x=0.50$ . (d) Side views of 1, 1.5 and 2 water molecules bound  
6 respectively for a discharge status of  $x=0.67$ . (e) Side views of 1, 1.5 and 2 water  
7 molecules bound respectively for a discharge status of  $x=0.75$ . (f) Side views of 1, 1.5  
8 and 2 water molecules bound respectively for a discharge status of  $x=1.0$ .  
9

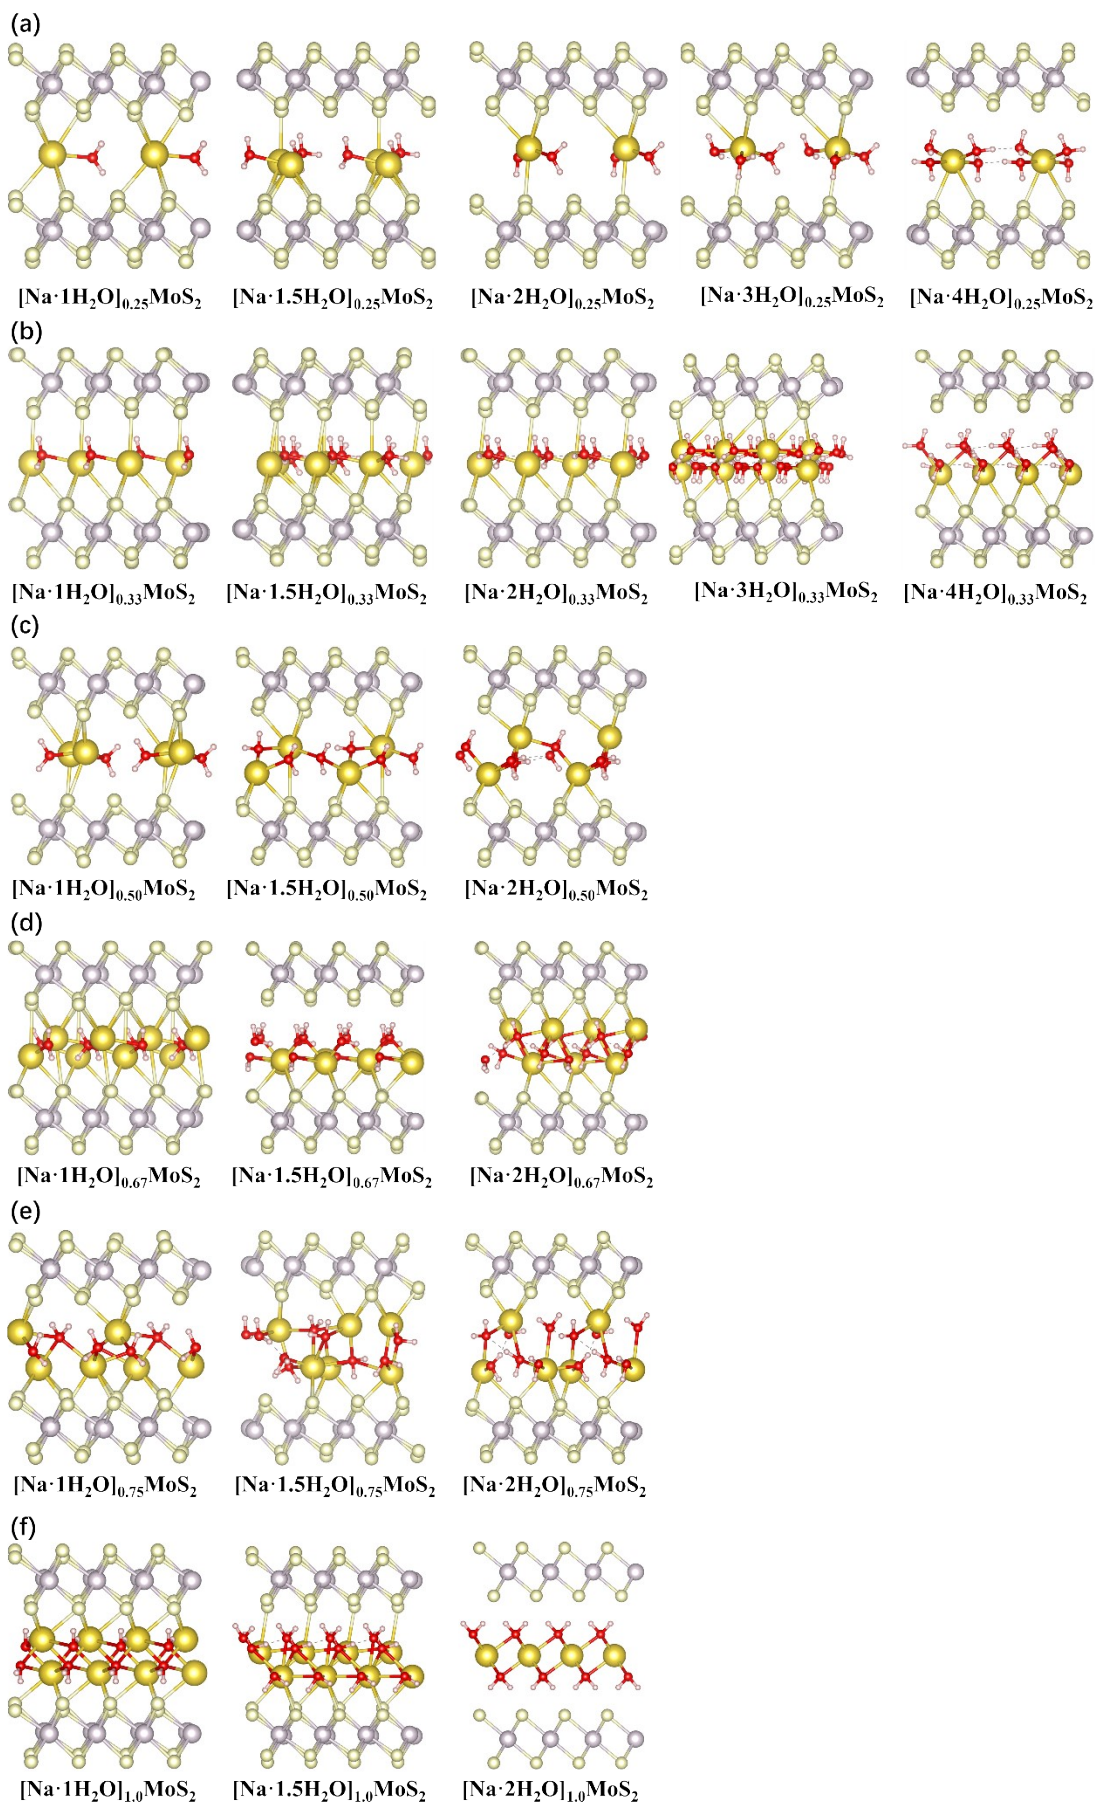

---

1 Figure S11. Side view of  $[\text{Na} \cdot m\text{H}_2\text{O}]_x\text{MoS}_2$  intra-layer intercalation. (a) Side views of  
2 1, 1.5, 2,3 and 4 water molecules bound respectively for a discharge status of  $x=0.25$ .  
3 (b) Side views of 1, 1.5, 2,3 and 4 water molecules bound respectively for a discharge  
4 status of  $x=0.33$ . (c) Side views of 1, 1.5 and 2 water molecules bound respectively for  
5 a discharge status of  $x=0.50$ . (d) Side views of 1, 1.5 and 2 water molecules bound  
6 respectively for a discharge status of  $x=0.67$ . (e) Side views of 1, 1.5 and 2 water  
7 molecules bound respectively for a discharge status of  $x=0.75$ . (f) Side views of 1, 1.5  
8 and 2 water molecules bound respectively for a discharge status of  $x=1.0$ .  
9



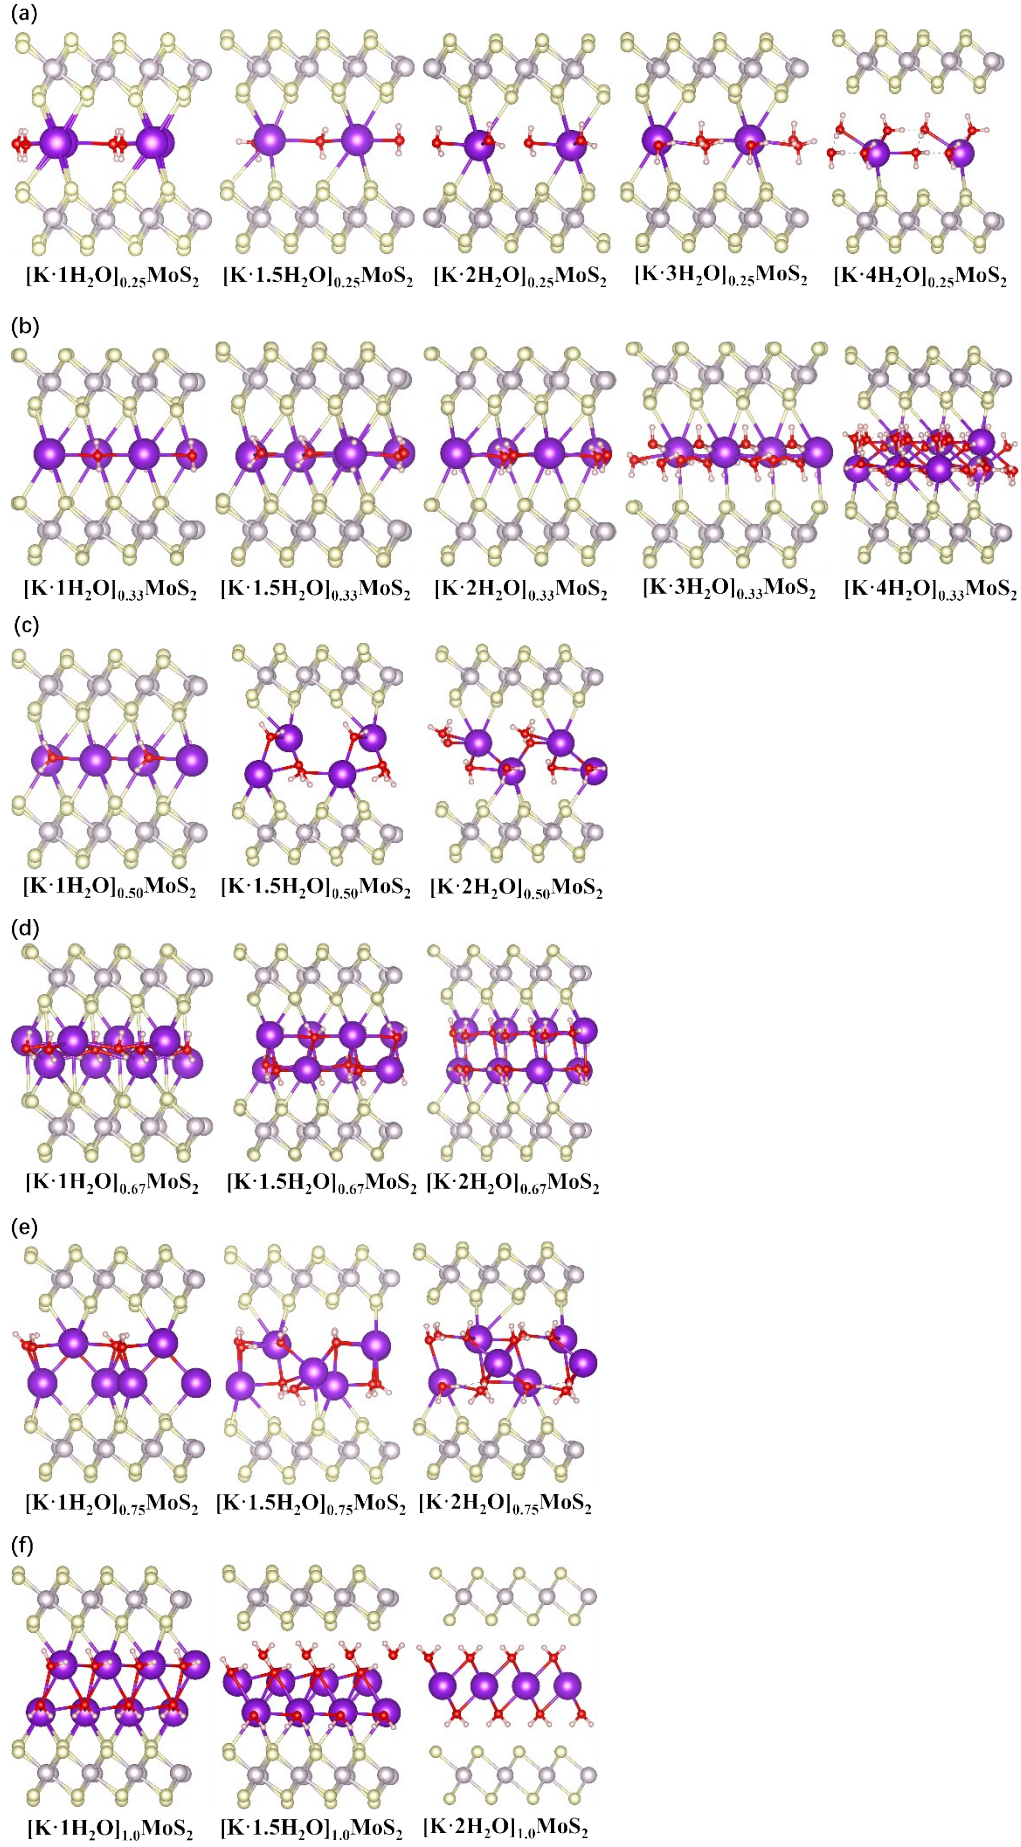

---

1 Figure S12. Side view of  $[\text{K} \cdot m\text{H}_2\text{O}]_x\text{MoS}_2$  intra-layer intercalation. (a) Side views of  
2 1, 1.5, 2,3 and 4 water molecules bound respectively for a discharge status of  $x=0.25$ .  
3 (b) Side views of 1, 1.5, 2,3 and 4 water molecules bound respectively for a discharge  
4 status of  $x=0.33$ . (c) Side views of 1, 1.5 and 2 water molecules bound respectively for  
5 a discharge status of  $x=0.50$ . (d) Side views of 1, 1.5 and 2 water molecules bound  
6 respectively for a discharge status of  $x=0.67$ . (e) Side views of 1, 1.5 and 2 water  
7 molecules bound respectively for a discharge status of  $x=0.75$ . (f) Side views of 1, 1.5  
8 and 2 water molecules bound respectively for a discharge status of  $x=1.0$ .  
9

## A: Proof of Equation (8)

In order to get Eq. (8), take  $\alpha \geq \beta$  as an example: a replacement reaction in the presence of  $\beta$  times as many hydrated ions will actually participate in the reaction, then:

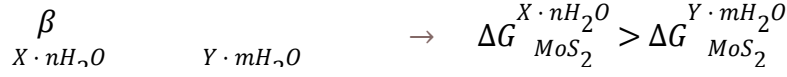

where,

$$\begin{aligned} \mu_{MoS_2(s)} + \mu_{e^-} + \mu_{X^+(aq)} + \mu_{nH_2O} - \mu_{(X \cdot nH_2O)MoS_2(s)} \\ > \mu_{MoS_2(s)} + \mu_{e^-} + \mu_{Y^+(aq)} + \mu_{mH_2O} - \mu_{(Y \cdot mH_2O)MoS_2(s)} \end{aligned}$$

Substituting the following equations into yields the above chemical potentials:

$$\mu_{X^+(aq)} = \mu_{X^+(aq)}^0 + KT \ln[X^+], \quad \mu_{Y^+(aq)} = \mu_{Y^+(aq)}^0 + KT \ln[Y]$$

And we get:

$$\begin{aligned} \mu_{MoS_2(s)} + \mu_{e^-} + \mu_{X^+(aq)}^0 + KT \ln[X^+] + \mu_{nH_2O} - \mu_{(X \cdot nH_2O)MoS_2(s)} \\ > \mu_{MoS_2(s)} + \mu_{e^-} + \mu_{Y^+(aq)}^0 + KT \ln[Y^+] + \mu_{mH_2O} - \mu_{(Y \cdot mH_2O)MoS_2(s)} \end{aligned}$$

Simplify it to:

$$\begin{aligned} \mu_{X^+(aq)}^0 + KT \ln[X^+] + \mu_{nH_2O} - \mu_{(X \cdot nH_2O)MoS_2(s)} \\ > \mu_{Y^+(aq)}^0 + KT \ln[Y^+] + \mu_{mH_2O} - \mu_{(Y \cdot mH_2O)MoS_2(s)} \end{aligned}$$

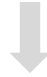

$$\begin{aligned} KT \ln[X^+] - KT \ln[Y^+] \\ > \mu_{Y^+(aq)}^0 - \mu_{X^+(aq)}^0 + \mu_{mH_2O} - \mu_{nH_2O} - \mu_{(Y \cdot mH_2O)MoS_2(s)} + \\ \mu_{(X \cdot nH_2O)MoS_2(s)} \end{aligned}$$

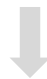

$$\begin{aligned} KT \ln[X^+] - KT \ln[Y^+] \\ > - (\mu_{X^+(aq)}^0 - \mu_{Y^+(aq)}^0) + \mu_{nH_2O} - \mu_{mH_2O} - \mu_{(X \cdot nH_2O)MoS_2(s)} \end{aligned}$$

Then we define:

1  
2  
3  
4  
5  
6  
7  
8  
9

$$\Delta = \mu_{X^+ (aq)}^0 - \mu_{Y^+ (aq)}^0 + \mu_{nH_2O} - \mu_{mH_2O} \mu_{(X \cdot nH_2O)MoS_2(s)} + \mu_{(Y \cdot mH_2O)MoS_2}$$

Then:

$$KTln[X^+] - KTln[Y^+] > - \Delta$$

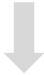

$$ln[X^+] - ln[Y^+] > - \frac{\Delta}{KT}$$

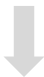

$$\frac{[X^+]}{[Y^+]} > e$$
